1 Full title

2 **Safety assessment of a novel C-type natriuretic peptide derivative and the**  
3 **mechanism of bone- and cartilage-specific toxicity**

4

5 Short title

6 **Bone specific toxicity of CNP derivative**

7

8 Takafumi Yotsumoto<sup>1,2\*</sup>, Naomi Morozumi<sup>1</sup>, Ryuichi Nakamura<sup>1,2</sup>, Toshimasa Jindo<sup>1,2</sup>,

9 Mayumi Furuya<sup>1</sup>, Yasuyuki Abe<sup>1,2</sup>, Tomonari Nishimura<sup>1,2</sup>, Hiroaki Maeda<sup>1,2</sup>, Hiroyuki

10 Ogasawara<sup>1,2</sup>, Yoshiharu Minamitake<sup>1</sup>, Kenji Kangawa<sup>3</sup>

11

12 <sup>1</sup> Asubio Pharma Co., Ltd., Kobe, Japan

13 <sup>2</sup> Daiichi Sankyo Co., Ltd., Tokyo, Japan

14 <sup>3</sup> National Cerebral and Cardiovascular Center Research Institute, Osaka, Japan

15

16 \* Corresponding author

17 E-mail address: [yotsumoto.takafumi.ur@daiichisankyo.co.jp](mailto:yotsumoto.takafumi.ur@daiichisankyo.co.jp) (TY)

18

19

## 20 **Abstract**

21 ASB20123, a C-type natriuretic peptide/ghrelin chimeric peptide, was designed as a  
22 novel peptide and demonstrated full agonistic activity for natriuretic-peptide receptor B and a  
23 significantly longer half-life in plasma compared with the native peptide. We researched the  
24 toxicological profile of ASB20123, the correlation between the morphological change of the  
25 epiphyseal plate and bone and cartilage toxicity, and biomarkers to detect the toxicity.  
26 ASB20123 was systemically administered to male and female rats at daily dose levels of 0.5,  
27 1.5, and 5.0 mg/kg/day for 4 weeks. In this study, toxicity was observed as changes related to  
28 bone and cartilage tissues, and no other toxicological changes were observed in all animals.  
29 Next, ASB20123 was administered to 12-month-old rats with a little epiphyseal plate. The  
30 toxic changes related to bone and cartilage tissues were not observed in any animal with a  
31 closed epiphyseal plate, indicating that the toxic changes were triggered by the  
32 growth-accelerating effect on the bone and cartilage. Furthermore, we searched for the  
33 biomarker related to the bone and cartilage toxicity using rats treated with ASB20123 at  
34 doses of 0.005, 0.05, 0.5, and 5.0 mg/kg/day for 4 weeks. A close correlation between  
35 necrosis/fibrosis in the epiphysis and metaphysis and thickness of the epiphyseal plate in the  
36 femur was confirmed in this study. A decrease in the bone mineral density (BMD) of the  
37 femur also was associated with the appearance of bone toxicity. These results indicated that  
38 the toxicity of ASB20123 was limited to bone- and cartilage-specific changes, and these

39 changes were triggered by an excessive growth accelerating effect. Furthermore, our data  
40 suggested that the thickness of the epiphyseal plate and BMD could be reliable biomarkers to  
41 predict bone toxicity.

## 43 **Introduction**

44           The C-type natriuretic peptide (CNP) analog is one of the most expecting therapeutic  
45 approaches to treat achondroplasia [1]. The binding of CNP to natriuretic-peptide receptor B  
46 (NPR-B) inhibits fibroblast growth factor receptor 3 downstream signaling [2], recognized as  
47 an important regulator of endochondral bone growth [3]. We recently reported that the  
48 exogenous administration of CNP-53 has the potential to stimulate skeletal growth related to  
49 short stature, and restore the skull morphology and size of foramen magnum in CNP-KO rats  
50 [4, 5]. As a CNP derivative, a clinical trial utilizing BMN-111 is currently proceeding in  
51 pediatric patients with achondroplasia [6]. We designed ASB20123, a CNP/ghrelin chimeric  
52 peptide, as a novel peptide. ASB20123 contains the full-length 22-amino acids of human  
53 CNP-22 fused to the 17-amino acids on the C-terminus region of human ghrelin, and the  
54 single amino acid is substituted in its ghrelin region. This novel derivative demonstrated full  
55 agonistic activity for NPR-B and showed significantly longer half-life in plasma compared  
56 with the native forms. A significant and dose-dependent increase in body length was shown  
57 in rats after 12 weeks of administration via subcutaneous infusion [7].

58           CNP is produced in the brain, kidney, bone, blood cells, blood vessels, and heart [8].  
59 NPR-B is expressed in the brain, lung, bone, heart, and ovary tissue. It is also expressed at  
60 relatively high levels in fibroblasts and vascular smooth muscle cells [9]. However, the  
61 changes that occur after excessive exogenous CNP exposure remain to be clarified.

62 Furthermore, the toxicological profile of the CNP derivative has not been reported previously.

63 In the present study, we evaluated the exhaustive toxicological profile of ASB20123.

64 Furthermore, we researched the relationship between the specific bone and cartilage toxicity

65 and morphological changes of the epiphyseal plate and reliable biomarkers to detect the

66 toxicity.

## 68 **Materials and Methods**

### 69 **Test article**

70 ASB20123 (GLSKGCFGLKLD RIGSMSGLGCVQQRKDSKKPPAKLQPR, C6 and  
71 C22 are bound as an intramolecular disulfide bond) was produced by Asubio Pharma Co. Ltd.,  
72 Japan using a recombinant DNA method in *Escherichia coli*, purified with high-performance  
73 liquid chromatography, and verified by amino acid composition analysis and amino acid  
74 sequence analysis [7]. The purity of ASB20123 was 98.4%. Acetate buffer (0.03 mol/L) was  
75 added with 10 w/v% sucrose and 1 w/v% benzyl alcohol and used as a vehicle. All chemicals  
76 and reagents used in the present study were purchased from FUJIFILM Wako Pure Chemical  
77 Industries, Ltd., Japan and Otsuka Pharmaceutical Factory, Inc., Japan.

78

### 79 **Animals**

80 Sprague-Dawley (SD) rats were purchased from Charles River Laboratories Japan,  
81 Inc., Japan and were used for the studies conducted at the Nonclinical Research Center, LSI  
82 Medience Corporation, Japan and Asubio Pharma Co., Ltd, Japan. The animals were housed  
83 in a humidity- and temperature-controlled environment with an automatic 12-h light/dark  
84 cycle. They were provided with a standard, pelleted lab chow diet (CRF-1, Oriental Yeast Co.,  
85 Ltd., Japan) and tap water *ad libitum*. All animal experiments were conducted in accordance  
86 with the Guidelines for Animal Experiments of LSI Medience Corporation, Japan and/or

87 Asubio Pharma Co., Ltd., Japan and were approved by the Institutional Animal Care and Use  
88 Committee of LSI Medience Corporation, Japan and/or the Committees for Ethics in Animal  
89 Experiments of Asubio Pharma Co., Ltd., Japan, respectively.

90

## 91 **Study protocol and administration**

### 92 **Toxicity profiling study (Study 1)**

93 Twenty male and 20 female rats at 7 weeks of age were randomly divided into 4 groups each  
94 with 5 males and 5 females. Dose levels were set at 0.5, 1.5, and 5.0 mg/kg/day. The control  
95 animals were treated with the vehicle at the same dosing volume as the test article-treated  
96 animals. The dosing volume was set at 1 mL/kg, and the dosing volume for each animal was  
97 calculated based on the most recent body weight. Each animal was injected with the dosing  
98 formulation subcutaneously once a day for 4 weeks into the back of the animals using a  
99 disposable injection needle and syringe. The dose levels were selected based on the result of  
100 previous study, in which the rats received at the dose of ASB20123 0.15 mg/kg/day for 12  
101 weeks showed over-growth [7].

### 102 **Mechanism study (Study 2)**

103 Fifteen male and 15 female rats at 12 months of age were randomly divided into 3 groups,  
104 each with 5 males and 5 females. Dose levels were set at 0.5 and 5.0 mg/kg/day. Other  
105 conditions and procedures were the same as those for study 1.

### 106 **Biomarker study (Study 3)**

107 Twenty-five male rats at 7 weeks of age were randomly divided into 5 groups with 5 males  
108 each. Dose levels were set at 0.005, 0.05, 0.5, and 5.0 mg/kg/day. Other conditions and  
109 procedures were the same as those for study 1.

110

### 111 **Observations and examination items**

112 In study 1, clinical observation, measurements of body weight, food and water  
113 consumption, ophthalmology, urinalysis, hematology, blood chemistry, measurements of  
114 serum alkaline phosphatase (ALP) isozymes and osteocalcin, body length (naso-anal length),  
115 bone mineral density (BMD), organ weight, necropsy, and histopathology analyses were  
116 conducted. In studies 2 and 3, clinical observation, measurements of body weight, body  
117 length, femur bone length, and BMD, necropsy, and histopathology of the femur and tibia  
118 were conducted.

### 119 **Clinical observation**

120 Clinical signs and mortality were observed once or more per day during the administration  
121 period.

### 122 **Blood chemistry**

123 Blood samples were collected from the posterior vena cava and centrifuged at  $1870 \times g$  for 10  
124 minutes to obtain serum samples. The total protein, albumin, A/G ratio, total bilirubin,



125 aspartate aminotransferase, alanine aminotransferase, gamma glutamyltranspeptidase, alkaline  
126 phosphatase, lactate dehydrogenase, creatine phosphokinase, total cholesterol, triglycerides,  
127 phospholipids, glucose, blood urea nitrogen, creatinine, inorganic phosphorus, and calcium  
128 were examined with an auto-analyzer (7170, Hitachi Ltd., Japan), and the sodium, potassium,  
129 and chloride were examined with an electrolyte analyzer (EA07, A&T Corporation, Japan).

### 130 **ALP isozymes and osteocalcin**

131 The remaining serum samples collected for blood chemistry were used for the serum ALP  
132 isozyme and osteocalcin measurement. For ALP isozyme measurement, the auto  
133 electrophoresis system (Epalyzer 2, Helena Laboratories Co., Ltd., USA) was used. For  
134 osteocalcin measurement, an immunoradiometric assay was applied with the Rat Osteocalcin  
135 IRMA kit (Immutopics, International, LLC., USA).

### 136 **Body length (naso-anal length and femur)**

137 At the end of the administration period, naso-anal lengths of each rat were examined with a  
138 scale after euthanasia. Femoral lengths were measured with digital calipers after removal at  
139 necropsy.

### 140 **Bone mineral density (BMD)**

141 Bone mineral density (cortical and sponge) of the isolated left femur of each rat was  
142 measured using CT scanning (Latheta LCT-200; Hitachi Aloka Medical, Japan).

### 143 **Histological examination**

144 Whole rats specimens were embedded in paraffin, sectioned, stained with hematoxylin and  
145 eosin (HE), and examined microscopically. The thickness of the epiphyseal plate at the  
146 proximal end of the femur was measured under a light microscope. It was measured at nine  
147 sites for the proximal end of the femur. The average thickness was considered the epiphyseal  
148 plate thickness for each rat.

149

## 150 **Statistical Analysis**

151 The homogeneity of variance was tested by Bartlett's method. When the groups were  
152 accepted as homogeneous, Dunnett's multiple comparison test was used for comparison of  
153 groups of data. When the groups of data were shown to be heterogeneous, Steel's multiple  
154 comparison test was applied to mean values. A two-tailed test was used as Bartlett's test, and  
155 *P* values less than 0.05 were considered statistically significant.

## 157 **Results**

### 158 **Toxicity profile of ASB20123 in study 1**

159           In the clinical observation, abnormal gait appearing as a shuffling gait of the hind  
160 limbs was observed in all the test article-treated groups at the dose level of 0.5 mg/kg/day or  
161 more at the 3<sup>rd</sup> week of administration and later. The number of animals exhibiting these  
162 symptoms increased dose-dependently. The BMD values of both cortical and spongy bone in  
163 the femur were significantly low in all the test article-treated groups compared with the  
164 control group (Fig 1).

165           The results of histopathological examination are shown in S1 table, and representative  
166 histopathological findings for the proximal femoral bone in rats are shown in Fig 2. The test  
167 article-related changes were observed in the bone/cartilage tissues as follows. In the femur,  
168 thickening of the epiphyseal plate was observed at the dose levels of 0.5 mg/kg/day or more.  
169 This change involved both the proximal and distal portions of the femur, was intense in the  
170 proximal portion, and was concomitant with increases in the primary bone and osteoblasts. In  
171 the proximal portion, there was necrosis of the epiphysis/metaphysis, fibrosis in the marrow  
172 of the head, and ectopic chondrogenesis/osteogenesis. In the tibia, thickening of the  
173 epiphyseal plate and an increase in the primary bone were observed in all the test  
174 article-treated groups. These changes involved both the proximal and distal portions of the  
175 tibia and were intense or highly frequent in the distal portion. There were also increases in

176 osteoblasts in the proximal and distal portions in males, and necrosis of the  
177 epiphysis/metaphysis and inflammatory changes in the surrounding tissues in the distal  
178 portion.

179 The changes in body length, ALP activity, ALP-isozyme fraction, and osteocalcin  
180 values are shown in Fig 3. Significantly high values of body length were shown in males at  
181 the dose levels of 5.0 mg/kg/day and in females at 0.5 mg/kg/day and more, compared with  
182 the vehicle control group. The ALP activity was significantly high in males at the dose levels  
183 of 1.5 and 5.0 mg/kg/day. Although there was no statistically significant difference, the same  
184 tendency was observed in males at the dose levels of 0.5 mg/kg/day and in females at 1.5 and  
185 5.0 mg/kg/day. The ALP-isozyme fraction 3 was significantly high in males and females at  
186 the dose levels of 5.0 mg/kg/day compared with the vehicle control group, and the same  
187 tendency was observed in males administered 0.5 and 1.5 mg/kg/day and females  
188 administered 1.5 mg/kg/day. Meanwhile, there were no changes in the osteocalcin  
189 concentrations in any group compared to the control group.

190 No changes were observed in any group in body weight, food and water consumption,  
191 ophthalmology, urinalysis, hematology, necropsy, and organ weight.

192

193 **Fig 1. BMD of both the cortical and spongy bone in the femurs of male (A) and female**  
194 **(B) rats treated subcutaneously with ASB20123 for 4 weeks.** Each value represents the

195 mean  $\pm$  SD of 5 rats, \*\*  $P < 0.01$  vs. vehicle-treated group by Dunnett's multiple comparison  
196 test.

197

198 **Fig 2. Representative histopathological findings in the proximal femoral bone in rats.**

199 (A) Vehicle group ( $\times 40$ ). (B) Vehicle group ( $\times 100$ ). (C) 0.5 mg/kg/day group ( $\times 40$ ). (D)

200 0.5 mg/kg/day group ( $\times 100$ ). Bidirectional arrows indicate the width of the epiphyseal plate.

201 Arrows indicate the necrosis of cartilage/osseous tissues. Scale bars represent 200  $\mu\text{m}$ .

202

203 **Fig 3. Effects of ASB20123 on the body length (A), ALP and ALP-isozyme fraction**

204 **activity (B), and osteocalcin value (C) in rats treated subcutaneously for 4 weeks. Each**

205 value represents the mean  $\pm$  SD of 5 rats, \*  $P < 0.05$ , \*\*  $P < 0.01$  vs. vehicle-treated group by

206 Dunnett's multiple comparison test.

207

208 **Mechanism of the specific bone and cartilage toxicity in study 2**

209 ASB20123 was administered to the 12-month-old rats. The epiphyseal plate closure

210 was observed in all observation sites of the vehicle group of the aged rats, except for the

211 proximal tibia in 2 female rats. The number of rats with the remaining epiphyseal plate in the

212 treatment group was larger than that in the vehicle group. Increases in osteoblasts and

213 primary bone and degeneration/necrosis in the epiphysis and metaphysis were observed in

214 some animals with the epiphyseal plate, but these findings were not observed in animals with  
 215 a closed epiphyseal plate (Table 1). No test article-related changes were observed in the  
 216 clinical observation, body weight, femur bone length, and BMD, but abnormal gait was  
 217 observed in only 1 animal in the clinical observation in the 0.5 mg/kg/day dosage group.  
 218

219 **Table 1. Histopathological findings in the femur and tibia in study 2**

| Organs / Tissues                            | Sex            | Male  |                  |            | Female |             |              |     |
|---------------------------------------------|----------------|-------|------------------|------------|--------|-------------|--------------|-----|
|                                             |                | Group | Vehicle          | ASB20123   |        | Vehicle     | ASB20123     |     |
|                                             |                |       | Dose (mg/kg/day) | 0          | 0.5    | 5.0         | 0            | 0.5 |
| Findings*                                   | No. of animals | 5     | 5                | 4#         | 5      | 5           | 5            |     |
| <b>Femur (proximal)</b>                     |                |       |                  |            |        |             |              |     |
| Epiphyseal plate closure                    |                | 5     | 4                | 4          | 5      | 3           | 0\$          |     |
| Thickening, epiphyseal plate                |                | -     | 1<br>(+)         | -          | -      | 2<br>(+/++) | 1\$<br>(++)  |     |
| Increase, osteoblast and primary bone       |                | -     | -                | -          | -      | 2<br>(+)    | -            |     |
| Degeneration/necrosis, epiphysis/metaphysis |                | -     | -                | -          | -      | 1<br>(+)    | 5<br>(+/+++) |     |
| <b>Femur (distal)</b>                       |                |       |                  |            |        |             |              |     |
| Epiphyseal plate closure                    |                | 5     | 5                | 2          | 5      | 2           | 1            |     |
| Thickening, epiphyseal plate                |                | -     |                  | 2<br>(+++) | -      | 3<br>(+/++) | 4<br>(+/+++) |     |
| Increase, osteoblast and primary bone       |                | -     | -                | 2<br>(+)   | -      | 3<br>(+)    | 4<br>(+/+++) |     |
| <b>Tibia (proximal)</b>                     |                |       |                  |            |        |             |              |     |
| Epiphyseal plate closure                    |                | 5     | 0                | 0          | 3      | 0           | 0            |     |
| Thickening, epiphyseal plate                |                | -     | 5<br>(+)         | 4<br>(+)   | -      | 1<br>(+)    | 5<br>(+)     |     |
| Increase, osteoblast and primary bone       |                | -     | 3<br>(+)         | 4<br>(+)   | -      | 5<br>(+)    | 5<br>(+)     |     |

Tibia (distal)

|                          |   |   |   |   |   |   |
|--------------------------|---|---|---|---|---|---|
| Epiphyseal plate closure | 5 | 5 | 5 | 5 | 5 | 5 |
|--------------------------|---|---|---|---|---|---|

---

220 Grades: -, normal; +, slight; ++, moderate; +++, severe; +/++, slight to moderate; +/+++,  
221 slight to severe; ++/+++, moderate to severe. The numbers of animals with histopathological  
222 findings are listed. Vehicle: 0.03 mol/L acetic acid buffer solution (pH 4) containing 10 w/v%  
223 sucrose and 1 w/v% benzyl alcohol. \*: No test article-related changes were observed in any  
224 animal without an epiphyseal plate. #: One animal was found dead on Day 7 due to the  
225 formation of a tumor in the duodenum. \$: The findings of epiphyseal plate were not evaluated  
226 in the proximal femoral bone of 4 rats, because the specimen did not have the target tissue.

227

### 228 **Searching for the biomarker related to the bone and cartilage** 229 **toxicity in study 3**

230 The thickness of the epiphyseal plate, femur bone length, and bone mineral density of  
231 the femur were measured in the rats treated with ASB20123 at doses of 0.005, 0.05, 0.5, and  
232 5.0 mg/kg/day for 4 weeks. The epiphyseal plate thickness increased in a dose-dependent  
233 manner, and the toxic findings in the epiphysis and metaphysis were observed only in  
234 individuals with thickening of more than 200  $\mu\text{m}$  of the epiphyseal plate. A decrease in the  
235 BMD in the femur also reflected the appearance of bone toxicity. In contrast, a correlation  
236 between the appearance of bone toxicity and body or femur lengths was not observed (Fig 4).  
237 The results for the other observations and examination items were similar to those of study 1.

238

239 **Fig 4. The correlation between bone and cartilage toxicity and several parameters.**

240 The thickness of the epiphyseal plate of the femur (A), body length (B), and bone length of  
 241 the femur (C). The BMD of the cortical bone (D) and spongy bone (E) in the femurs is shown.  
 242 Bone toxicity observed in each animal is shown in the colored circle, the open circle  
 243 represents no toxicity, orange indicates slight toxicity, and red indicates severe toxicity. Each  
 244 bar represents the mean of 5 rats.

245

246 **Table 2. Histopathological findings of the femur and tibia in study 3.**

| Organs/Tissues                              | Group<br>Dose (mg/kg/day) | Vehicle | ASB20123 |          |             |               |
|---------------------------------------------|---------------------------|---------|----------|----------|-------------|---------------|
|                                             |                           | 0       | 0.005    | 0.05     | 0.5         | 5.0           |
| Findings                                    | No. of animals            | 5       | 5        | 5        | 5           | 5             |
| Femur (proximal)                            |                           |         |          |          |             |               |
| Thickening, epiphyseal plate                |                           | -       | 1<br>(+) | 4<br>(+) | 5<br>(+/++) | 5<br>(++/+++) |
| Increase, osteoblast and primary bone       |                           | -       | 1<br>(+) | 3<br>(+) | 4<br>(+)    | 4#<br>(+)     |
| Degeneration/necrosis, epiphysis/metaphysis |                           | -       | -        | -        | 4<br>(+)    | 5<br>(+/+++)  |
| Femur (distal)                              |                           |         |          |          |             |               |
| Thickening, epiphyseal plate                |                           | -       | -        | -        | 4<br>(+)    | 4<br>(+)      |
| Increase, osteoblast and primary bone       |                           | -       | -        | 3<br>(+) | 5<br>(+)    | 5<br>(+)      |
| Tibia                                       |                           |         |          |          |             |               |
| (proximal)                                  |                           |         |          |          |             |               |
| Thickening, epiphyseal plate                |                           | -       | -        | -        | 1<br>(+)    | 2<br>(+)      |
| Tibia (distal)                              |                           |         |          |          |             |               |



|                                             |   |   |             |             |            |
|---------------------------------------------|---|---|-------------|-------------|------------|
| Thickening, epiphyseal plate                | - | - | 5<br>(+/++) | 4#<br>(+++) | 5<br>(+++) |
| Increase, osteoblast and primary bone       | - | - | -           | 2#<br>(+)   | 4#<br>(+)  |
| Degeneration/necrosis, epiphysis/metaphysis | - | - | -           | 3#<br>(+)   | 3<br>(+)   |

247 Grades: -, normal; +, slight; ++, moderate; +++, severe; +/++, slight to moderate; ++/+++,  
 248 moderate to severe. The numbers of animals with pathological changes are listed. Vehicle:  
 249 0.03 mol/L acetic acid buffer solution (pH 4) containing 10 w/v% sucrose and 1 w/v% benzyl  
 250 alcohol. #: The findings in each one were not evaluated because the specimen did not have  
 251 the target tissue.

## 253 Discussion

254 ASB20123 is a CNP derivative, and this peptide stimulates bone growth through  
255 proliferation and differentiation of chondrocytes [7]. In this study, ASB20123 was  
256 administered to male and female rats at daily dose levels of 0.5, 1.5, and 5.0 mg/kg/day for 4  
257 weeks to investigate its toxicity. In this study, toxic changes were observed in the bone and  
258 cartilage tissues, and no other toxic changes were observed in all animals.

259 In the histopathological examination, thickening of the epiphyseal plate, which was  
260 frequently accompanied by increases in the primary bone and osteoblasts, was observed in  
261 the femur and tibia in all the test article-treated groups. Similar cartilage thickening was also  
262 detected in the temporomandibular joint and sternum. These findings were characteristic,  
263 prominent, and therefore considered to be primary changes based on the pharmacological  
264 action of ASB20123. In relation to the above osseous changes, the body length was extended  
265 in all the test-article treated groups, and serum ALP-isozyme fraction activity increased, since  
266 it is derived from bone and is elevated in the serum as a result of various bone diseases and  
267 bone growth. In addition to the above changes due to a pharmacological action of ASB20123,  
268 the following toxicity findings were observed in this study. In the proximal portion of the  
269 femur, there was necrosis of the epiphysis/metaphysis, fibrosis in the marrow of the head, and  
270 ectopic chondrogenesis/osteogenesis in all the test article-treated groups. Necrosis of the  
271 trabecula/marrow in the epiphysis of the head and degeneration/necrosis of the peripheral

272 muscle fibers was also sporadically observed. In the tibia, there was necrosis of the  
273 epiphysis/metaphysis and inflammatory changes in the surrounding tissues in the distal  
274 portion. All these findings associated with the above-mentioned primary changes were  
275 probably inflammatory, ischemic, or reactive due to the physical or physiological stimulation  
276 following thickening of the epiphyseal plate. These changes were intense or localized in the  
277 proximal portion, especially in the head of the femur and in the distal portion of the tibia,  
278 suggesting a possibility that the landing-shock on the hind limbs during walking/moving  
279 accelerates these bone/cartilage changes. Clinical signs revealed shuffling gait of the hind  
280 limbs. This symptom was considered to be caused by the excessive cartilage increase in the  
281 distal tibia.

282 To research the involvement of the epiphyseal plate in the bone-related changes,  
283 ASB20123 was administered to the 12-month-old rats with a little epiphyseal plate. The  
284 epiphyseal plate closure was observed in all examination sites of the vehicle group, except for  
285 in the proximal tibias of 2 female rats. The number of rats with the remaining epiphyseal  
286 plate in the test article-treated group was larger than that in the vehicle group. It was  
287 suggested that the administration of ASB20123 delayed the epiphyseal plate closure, and this  
288 result corresponded to those of our previous reports [4, 5]. An increase in osteoblasts and  
289 primary bone and degeneration/necrosis in the epiphysis and metaphysis were not observed in  
290 any animal with a closed epiphyseal plate. These results indicated that the toxic changes in

291 the bone and cartilage tissues were triggered by the excessive growth-accelerating effect  
292 based on the pharmacological action of ASB20123.

293 Biomarkers related to bone and cartilage toxicity, thickness of the epiphyseal plate,  
294 body length, femur bone length, and BMD of the cortical and spongy bone in the femur were  
295 measured in the rats treated with ASB20123 at the doses of 0.005, 0.05, 0.5, and 5.0  
296 mg/kg/day for 4 weeks. A reliable correlation between necrosis/fibrosis in the epiphysis and  
297 metaphysis and thickness of the epiphyseal plate of the femur was confirmed in this study. A  
298 decrease in BMD in the cortical bone in the femur was also relevant to the bone and cartilage  
299 toxicity. These parameters might be good markers to predict bone- and cartilage-specific  
300 toxic changes, because the thickness of the epiphyseal plate can be monitored using  
301 radiographic examination, computed tomography, and magnetic resonance imaging in  
302 humans [12, 13].

303 In this study, we evaluated the toxic profile of ASB20123 the CNP derivative with an  
304 extended half-life. As a result, over-dosing of ASB20123 induced excessive growth  
305 acceleration through endochondral bone growth, resulting in bone- and cartilage-specific  
306 toxicity changes in normal young rats without closed epiphyseal plates. Furthermore, our data  
307 suggested that the thickness of the epiphyseal plate and BMD of the cortical bone could be  
308 reliable biomarkers to predict bone- and cartilage-specific toxicity. The dosage regimen of  
309 CNP analog and derivative would be a key factor for successful of therapeutic drug.

## 311 **References**

- 312 1. Ornitz DM, Legeai-Mallet L. Achondroplasia: Development, pathogenesis, and therapy.  
313 Dev Dyn. 2017;246(4): 291-309.
- 314 2. Krejci P, Masri B, Fontaine V, Mekikian PB, Weis M, Prats H, et al. Interaction of  
315 fibroblast growth factor and C-natriuretic peptide signaling in regulation of chondrocyte  
316 proliferation and extracellular matrix homeostasis. J Cell Sci. 2005;118: 5089-5100
- 317 3. Chusho H, Tamura N, Ogawa Y, Yasoda A, Suda M, Miyazawa T, et al. Dwarfism and  
318 early death in mice lacking C-type natriuretic peptide. Proc Natl Acad Sci. 2001;98:  
319 4016-4021.
- 320 4. Fujii T, Hirota K, Yasoda A, Takizawa A, Morozumi N, Nakamura R, et al. Rats deficient  
321 C-type natriuretic peptide suffer from impaired skeletal growth with normal life-span.  
322 PLoS One. 2018;13(3): e0194812. <https://doi.org/10.1371/journal.pone.0194812> PMID:  
323 29566041.
- 324 5. Yotsumoto T, Morozumi N, Furuya M, Fujii T, Hirota K, Ueda Y, et al. Foramen  
325 magnum stenosis and midface hypoplasia in C-Type natriuretic peptide deficient rats and  
326 its restoration by exogenous administration of CNP-53. PLoS One 2019;14(5): e0216340.  
327 <https://doi.org/10.1371/journal.pone.0216340> PMID: 31120905.
- 328 6. Legeai-Mallet, L. C-type natriuretic peptide analog as therapy for achondroplasia. Endocr  
329 Dev 2016;10(30): 98-105. doi: 10.1159/000439334.

- 330 7. Morozumi N, Yotsumoto T, Yamaki A, Yoshikiyo K, Yoshida S, Nakamura R, et al.  
331 ASB20123: A novel C-type natriuretic peptide derivatives for the treatment of growth  
332 failure and dwarfism. *PLoS One* 2019; 14(2): e0212680  
333 <https://doi.org/10.1371/journal.pone.0212680> PMID: 30794654.
- 334 8. Komatsu Y, Nakao K, Suga S, Ogawa Y, Mukoyama M, Arai H, Shirakami G, Hosoda K,  
335 Nakagawa O, Hama N, Kishimoto I, Imura H, C-type natriuretic peptide (CNP) in rats  
336 and humans. *Endocrinology*. 1991;129(2): 1104-1106.
- 337 9. Potter LR. Regulation and therapeutic targeting of peptide-activated receptor guanylyl  
338 cyclases. *Pharmacol Ther*. 2011;130(1): 71-82.
- 339 10. Lorget F, Kaci N, Peng J, Benoist-Lasselain C, Mugniery E, Oppeneer T, et al. Evaluation  
340 of the therapeutic potential of a CNP analog in a *Fgfr3* mouse model recapitulating  
341 achondroplasia. *Am J Hum Genet*. 2012;91(6): 1108-1114. doi:  
342 10.1016/j.ajhg.2012.10.014.
- 343 11. Wendt DJ, Dvorak-Ewell M, Bullens S, Lorget F, Bell SM, Peng J, et al. Neutral  
344 endopeptidase-resistant C-type natriuretic peptide variant represents a new therapeutic  
345 approach for treatment of fibroblast growth factor receptor 3-related dwarfism. *J*  
346 *Pharmacol Exp Ther*. 2015;353(1): 132-149. doi: 10.1124/jpet.114.218560.
- 347 12. Chang CY, Rosenthal DI, Mitchell DM, Handa A, Kattapuram SV, Huang AJ. Imaging  
348 findings of metabolic bone disease. *Radiographics*. 2016;36(6): 1871-1887.

349 13. Jawetz ST, Shah PH, Potter HG. Imaging\_of physeal injury: overuse. Sports Health.

350 2015;7(2): 142-153. doi: 10.1177/1941738114559380.

351

## 352 **Supporting Information**

353 **S1 Table Histopathology in rats treated subcutaneously with ASB20123 for 4 weeks.**

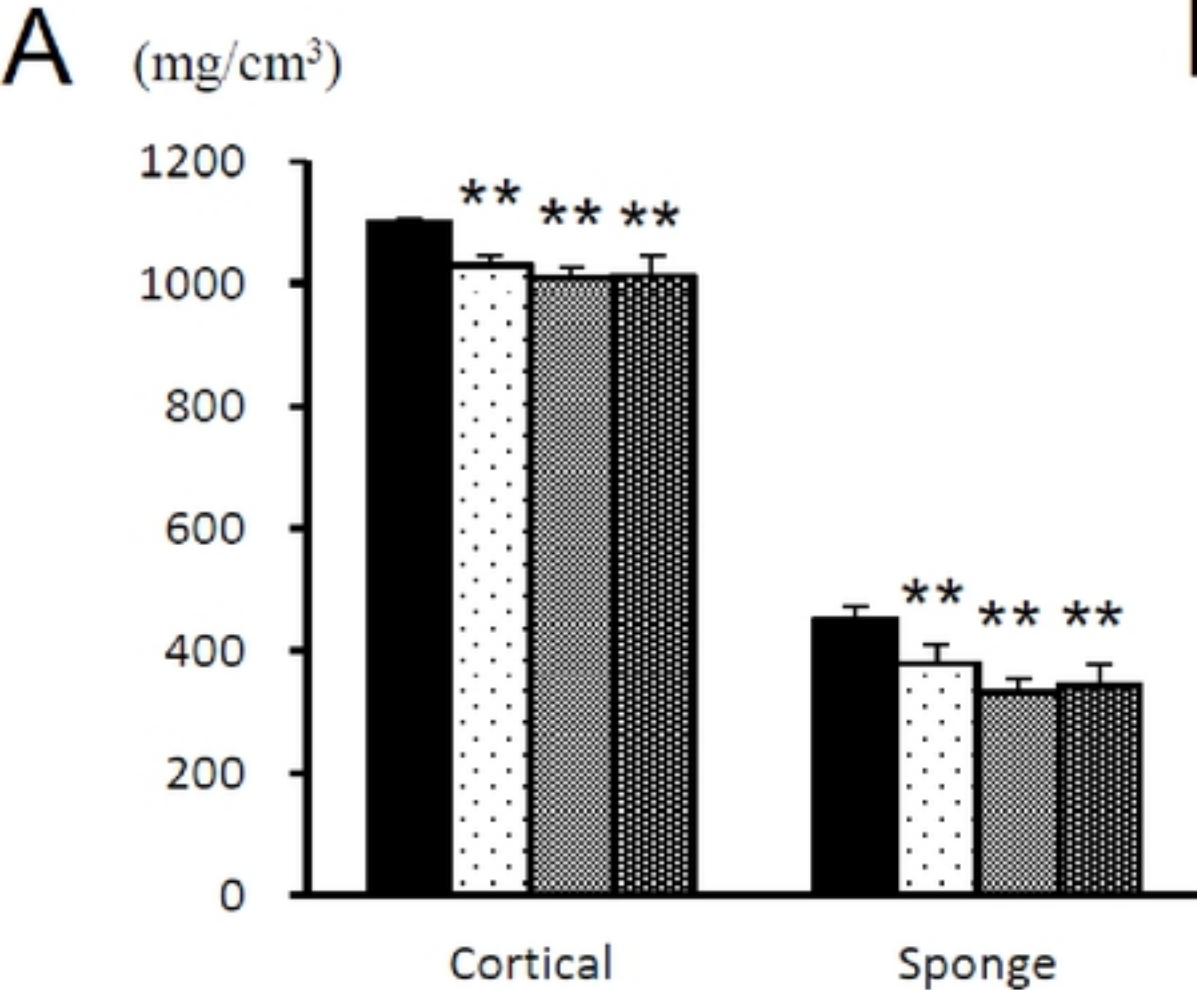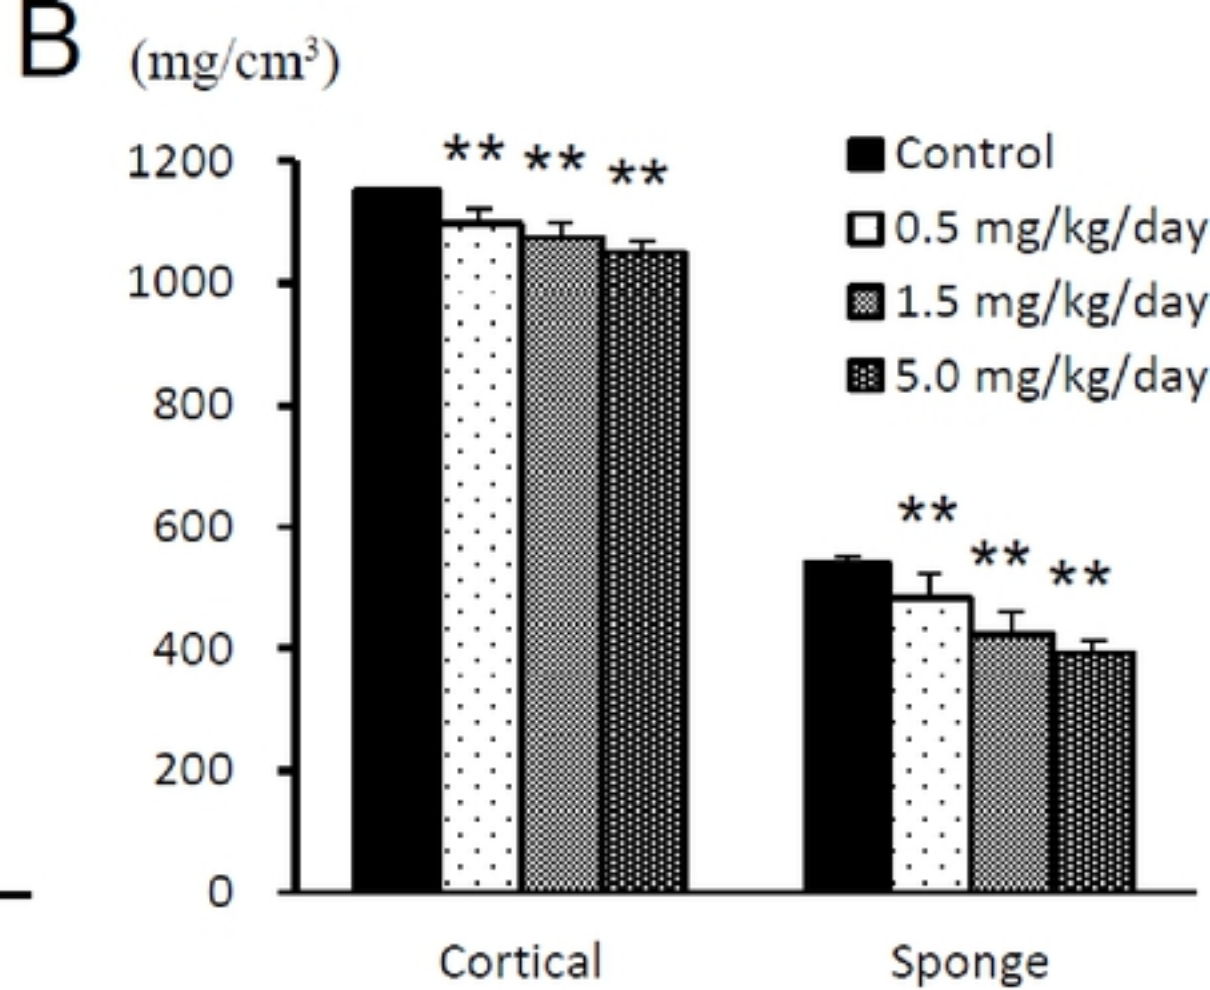

Figure 1



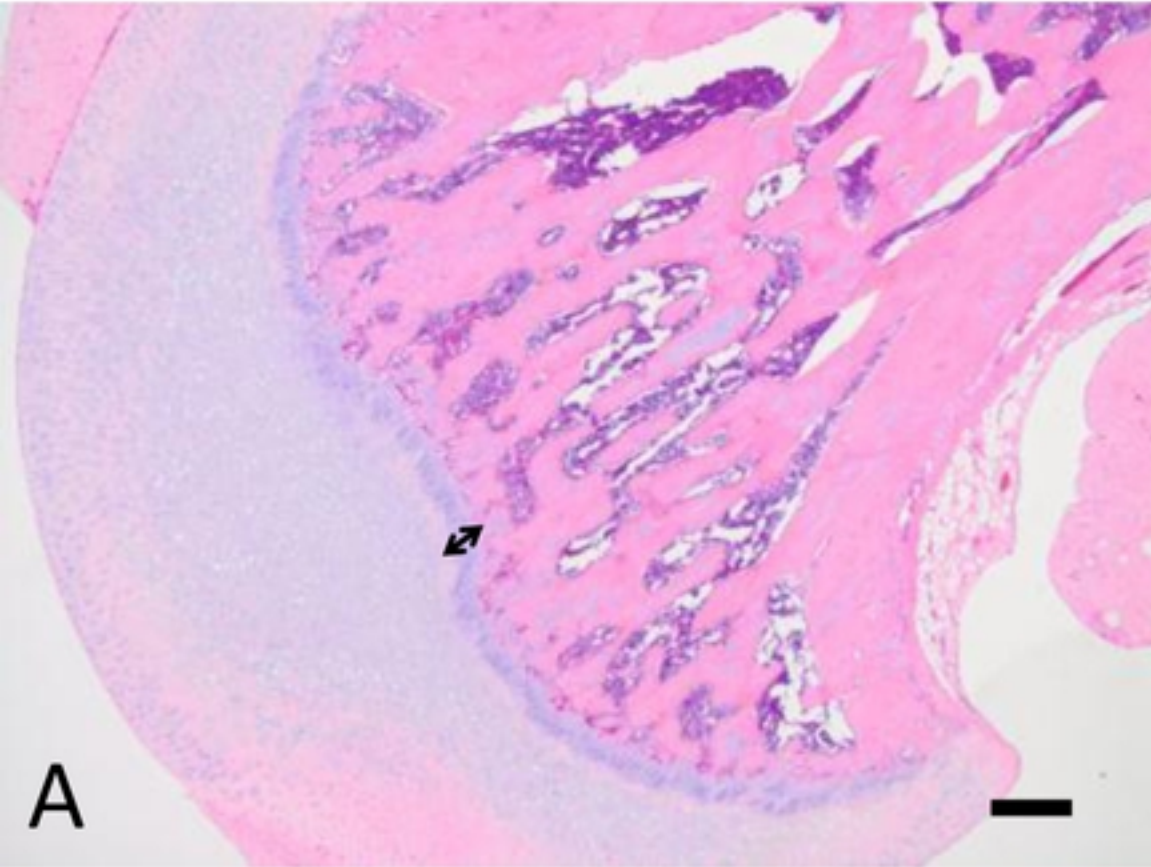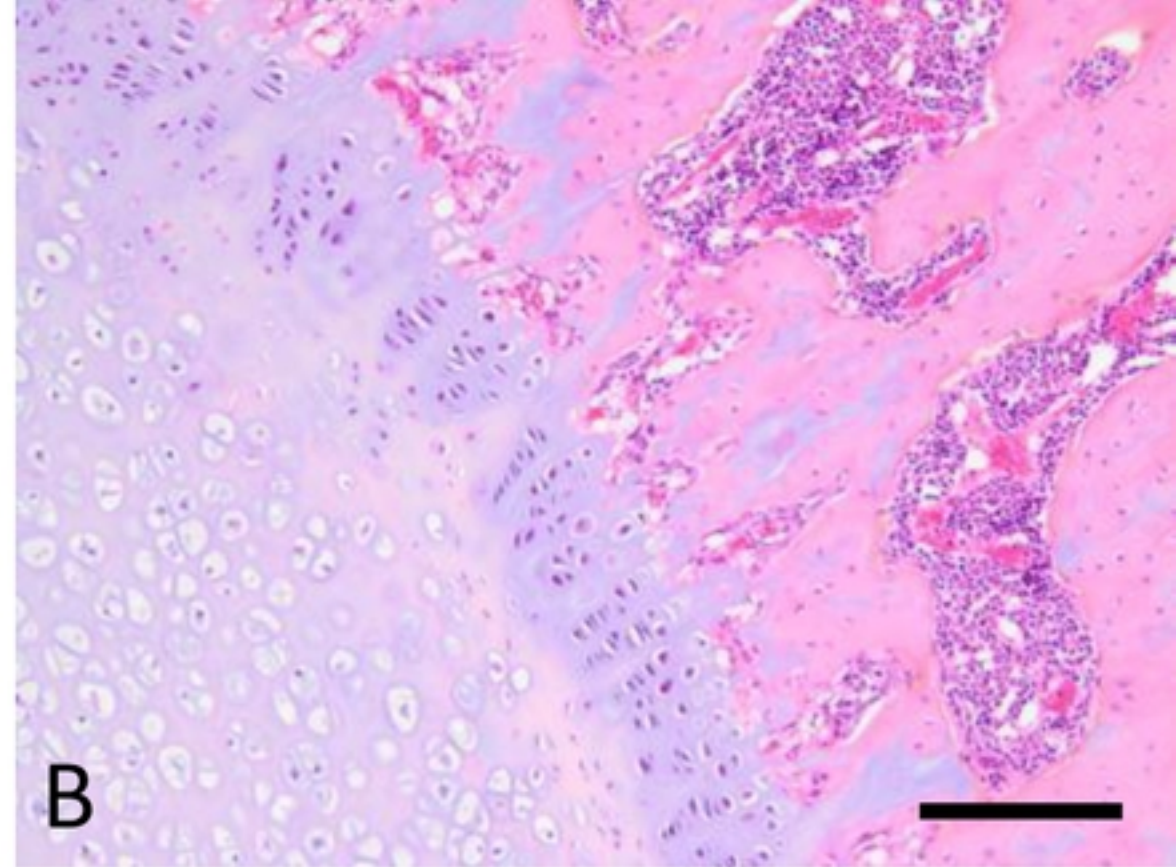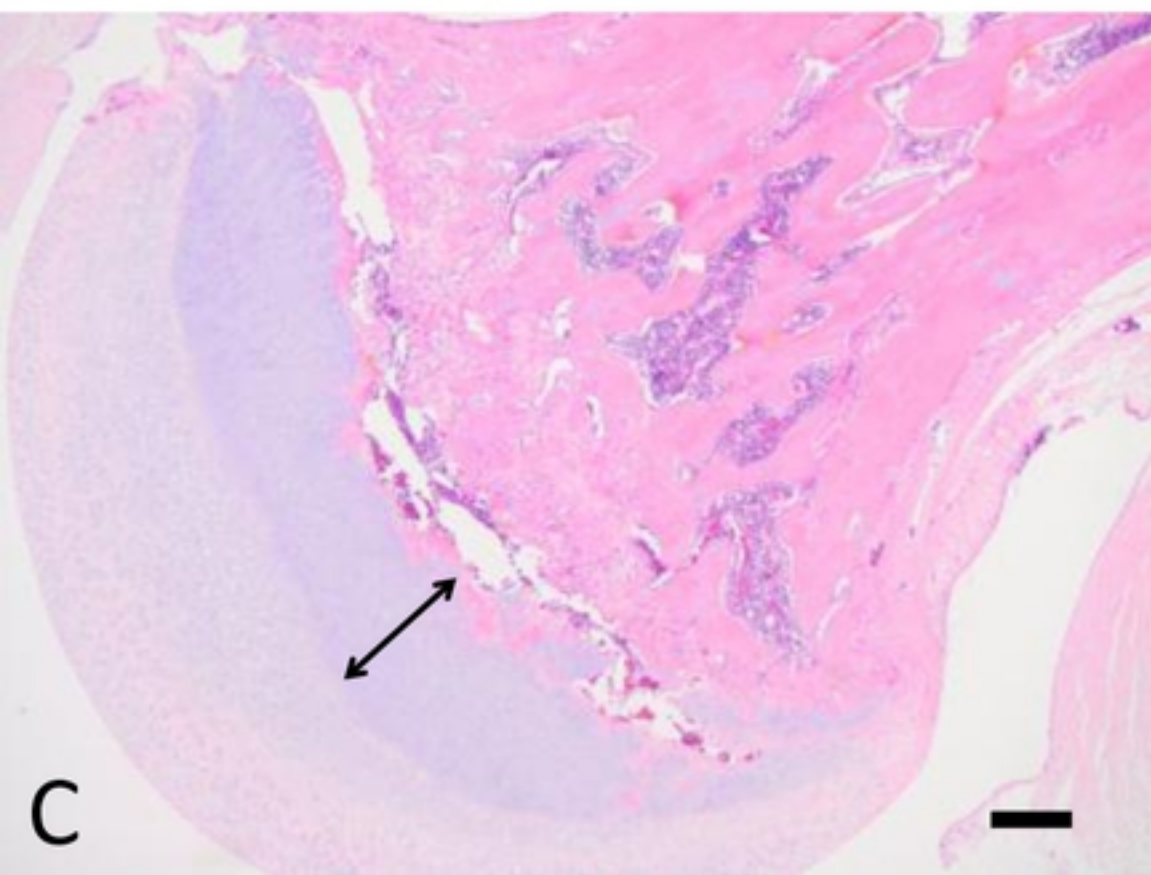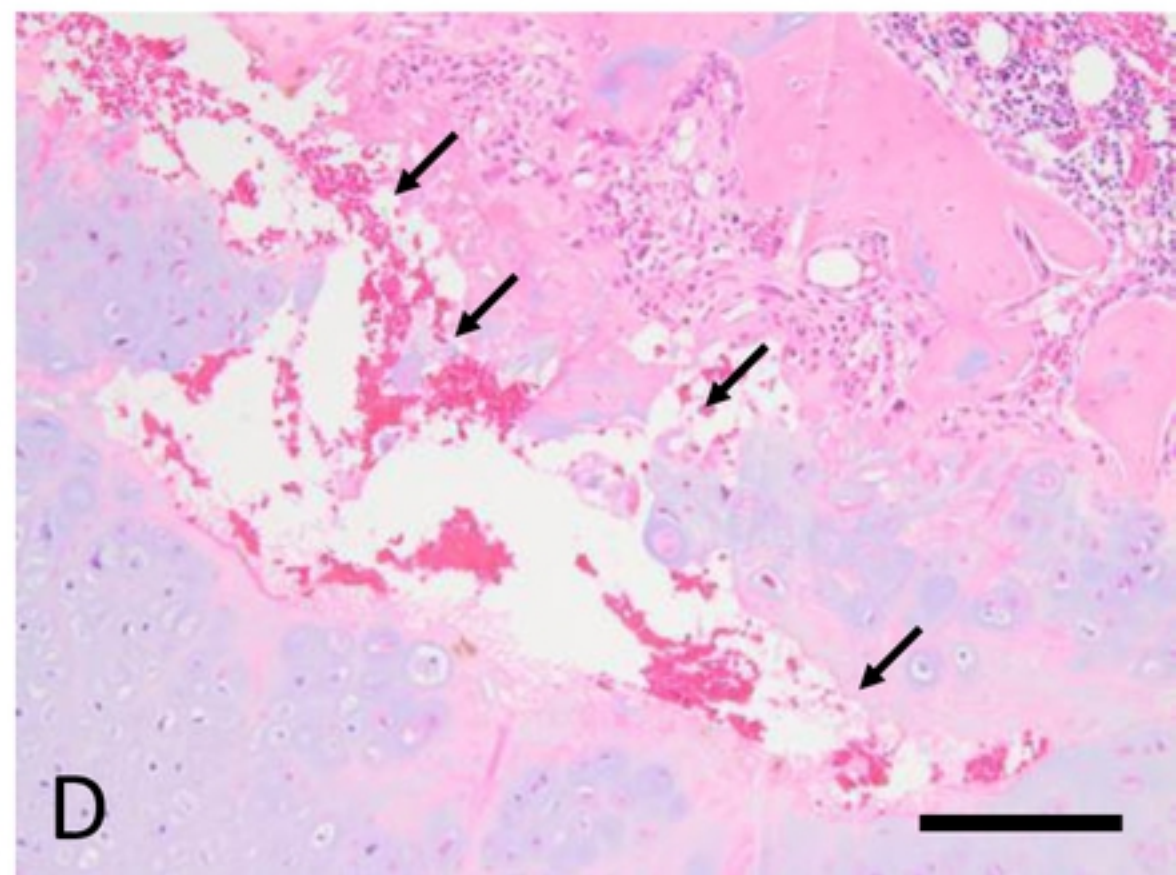

Figure 2



A

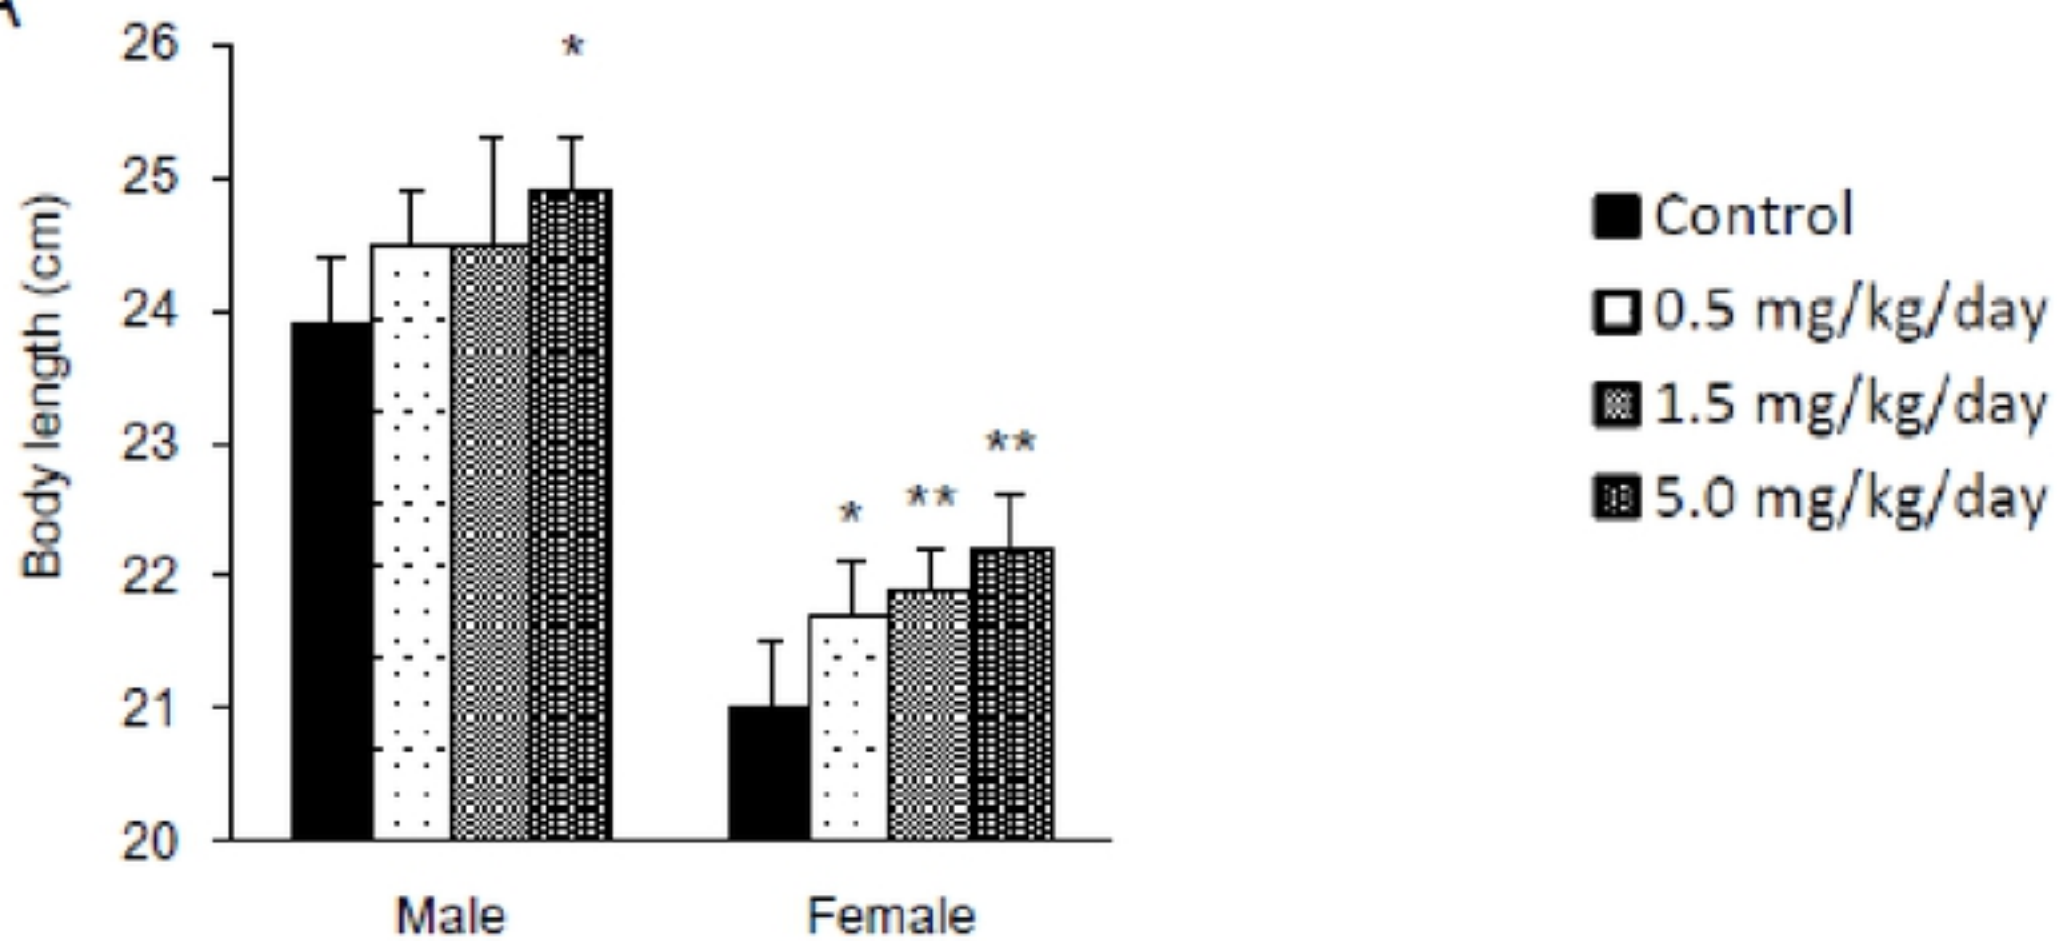

bioRxiv preprint doi: <https://doi.org/10.1101/655548>; this version posted May 30, 2019. The copyright holder for this preprint (which was not certified by peer review) is the author/funder, who has granted bioRxiv a license to display the preprint in perpetuity. It is made available under aCC-BY 4.0 International license.

B

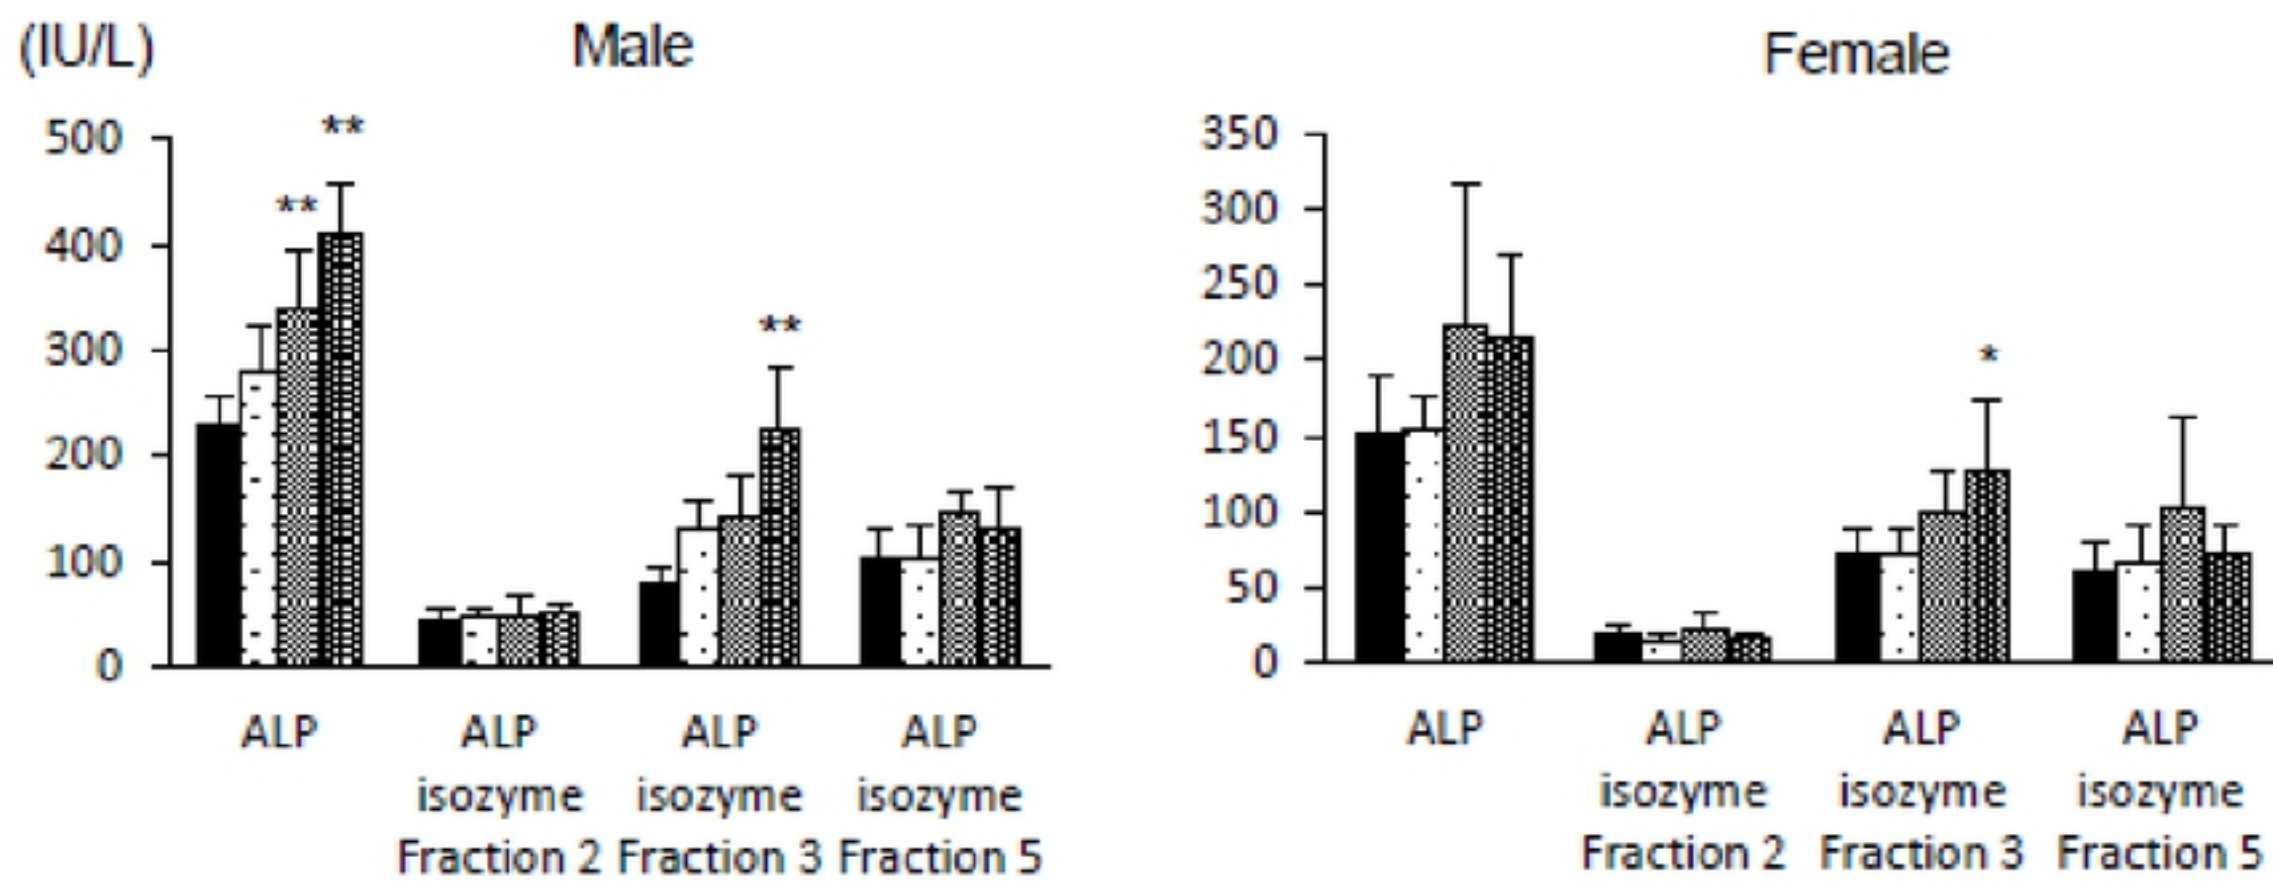

C

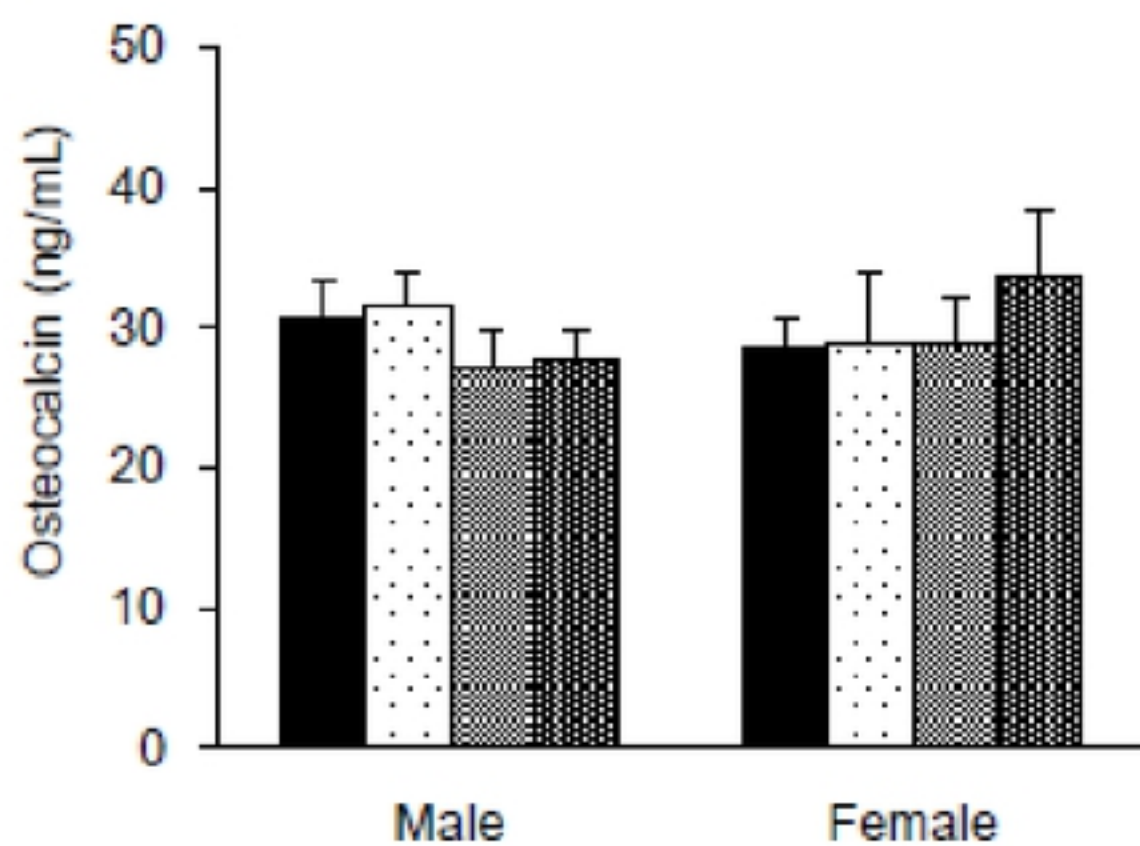

Figure 3

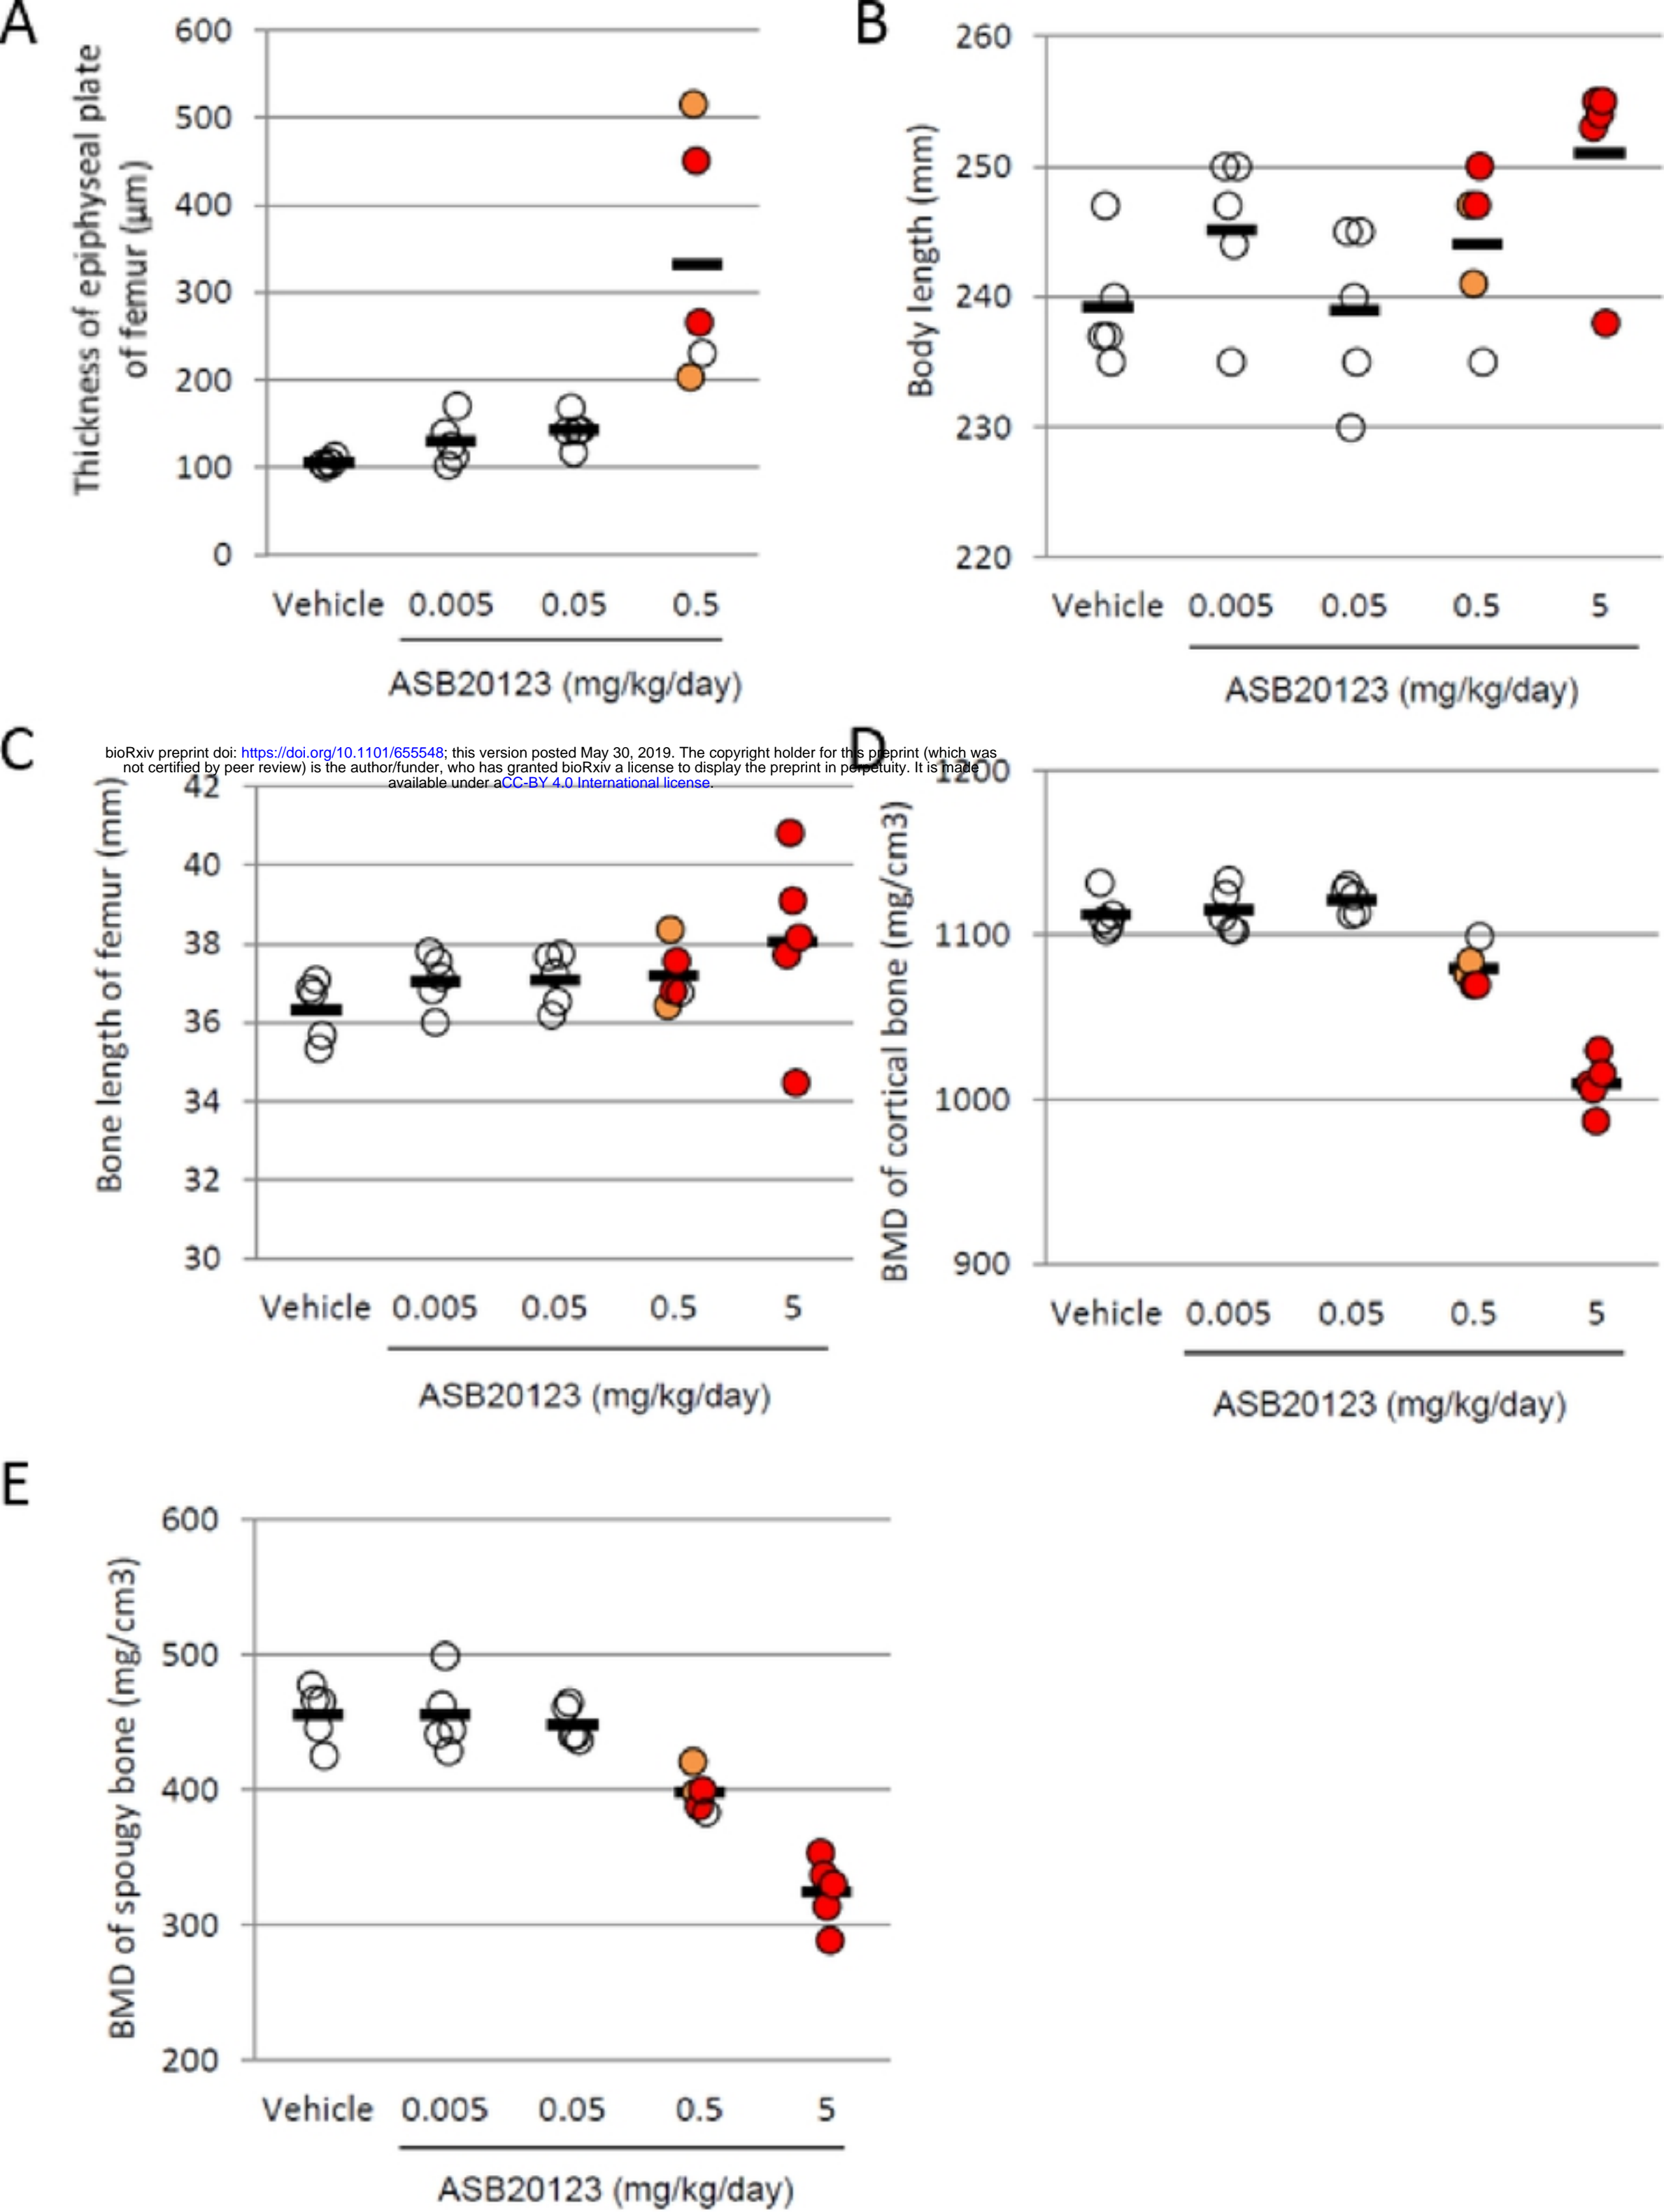

Figure 4
